# Supplementary material for: Controllable synthesis of a nanoparticle-modified thin-layer 3D flower-like CuZnAl-LDHs material with high NO2 gas sensing performance at room temperature
Source: Royal Society of Chemistry journal article supplement (doi:10.1039/d2nj01470j), 2022-01-01
Supplement: d2nj01470j1.pdf [file d2nj01470j1.pdf]

**Controllable synthesis of nanoparticle-modified thin-layers 3D flower-like  
CuZnAl-LDHs material with high NO<sub>2</sub> gas sensing performance at room  
temperature**

Mingyue Lv <sup>a</sup>, Shuiting Luo <sup>a</sup>, Ye Tian <sup>c</sup>, Chong Lin <sup>a</sup>, Lin Jiang <sup>a</sup> Li Li <sup>\*a,b</sup>, Keying Shi

<sup>\*a</sup>

<sup>a</sup> *Key Laboratory of Functional Inorganic Material Chemistry, Ministry of Education.*

*School of Chemistry and Material Science, Heilongjiang University, Harbin, 150080,*

*P. R. China.*

<sup>b</sup> *College of Modern Agriculture and Ecological Environment, Heilongjiang University,*

*Harbin 150080, P. R. China*

<sup>c</sup> *Department of Mechanical Engineering, The University of Hong Kong, Pokfulam,*

*Hong Kong Special Administrative Region*

\*Corresponding author: Tel.: +86 451 86609141; +86 451 86604920

Email: lili1993036@hlju.edu.cn, [shikeying2008@163.com](mailto:shikeying2008@163.com)

**Table S1** Comparison of LDHs based sensor gas sensing performances of the current work with other reported literatures.

| Samples                                | Operating temperature | Application           | Gas concentration | Sensitivity ( $R_a/R_g$ ) | Response (S) | Ref              |
|----------------------------------------|-----------------------|-----------------------|-------------------|---------------------------|--------------|------------------|
| CoAl-LDHs                              | RT                    | NO <sub>x</sub>       | 100 ppm           | 17.09                     | 4.27         | 27               |
| NiAl-LDHs                              | RT                    | O <sub>3</sub>        | 700 ppb           | 1.84                      | 8            | 28               |
| ZnTi-LDHs/RGO                          | RT                    | NO <sub>2</sub>       | 10 ppm            | 97%                       | 4            | 29               |
| Ti <sub>3</sub> C <sub>2</sub> Tx-LDHs | RT                    | NH <sub>3</sub>       | 500 ppb           | 1.97                      | 11           | 1                |
| Expanded graphite/NiAl-LDHs            | RT                    | NO <sub>x</sub>       | 100 ppm           | 17.65                     | 2            | 2                |
| PANI/ZnTi-LDHs                         | RT                    | NH <sub>3</sub>       | 50 ppm            | 18.22                     | 3            | 3                |
| PS@Co-LDHs                             | 200 °C                | Ethanol               | 4.3 ppm           | 2.48                      | 4            | 4                |
| Ni-Fe-Al-LDHs                          | RT                    | NO <sub>x</sub>       | 100 ppm           | 86%                       | 2.6          | 5                |
| <b>CuZnAl-LDHs</b>                     | <b>RT</b>             | <b>NO<sub>2</sub></b> | <b>100 ppm</b>    | <b>22.30</b>              | <b>2.66</b>  | <b>This work</b> |

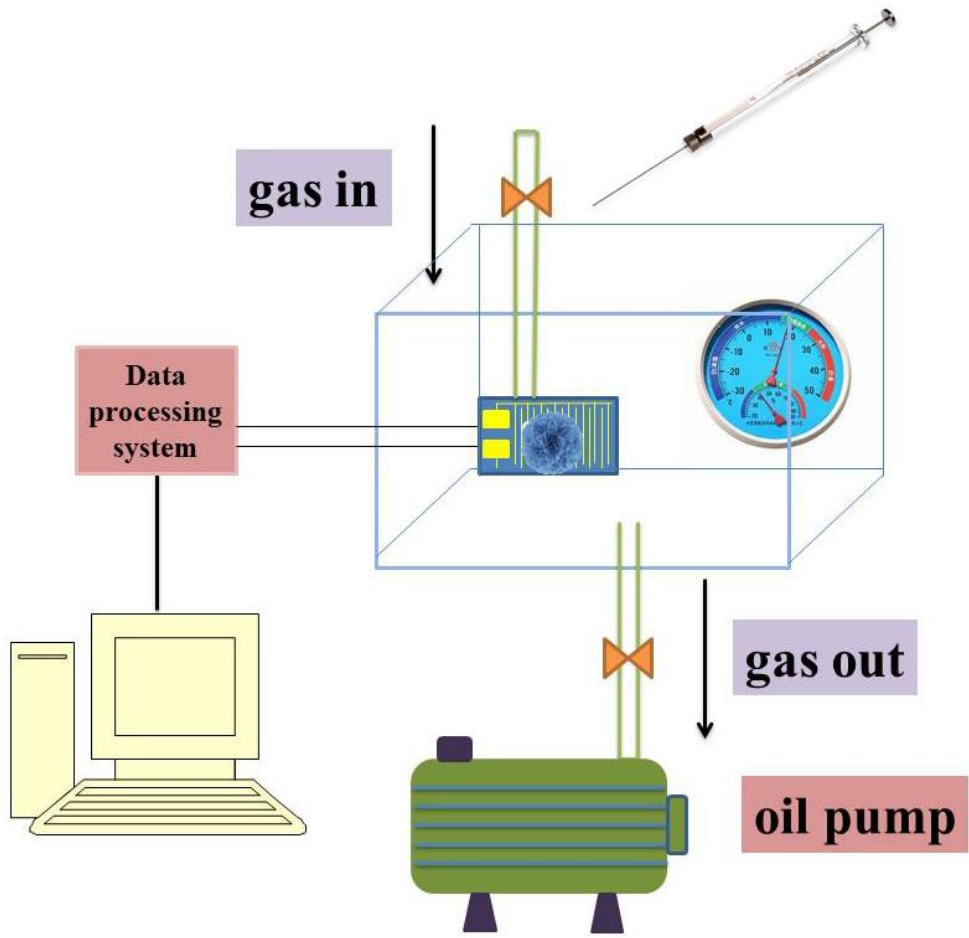

**Scheme S1** Self-assembled gas sensor diagram

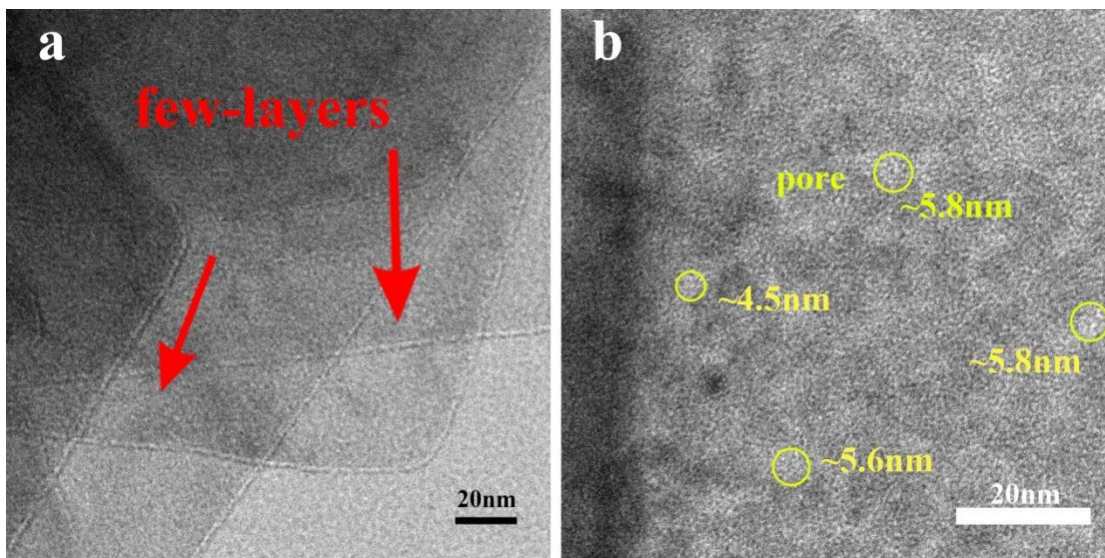

**Fig. S1** HRTEM image of CZA-2.

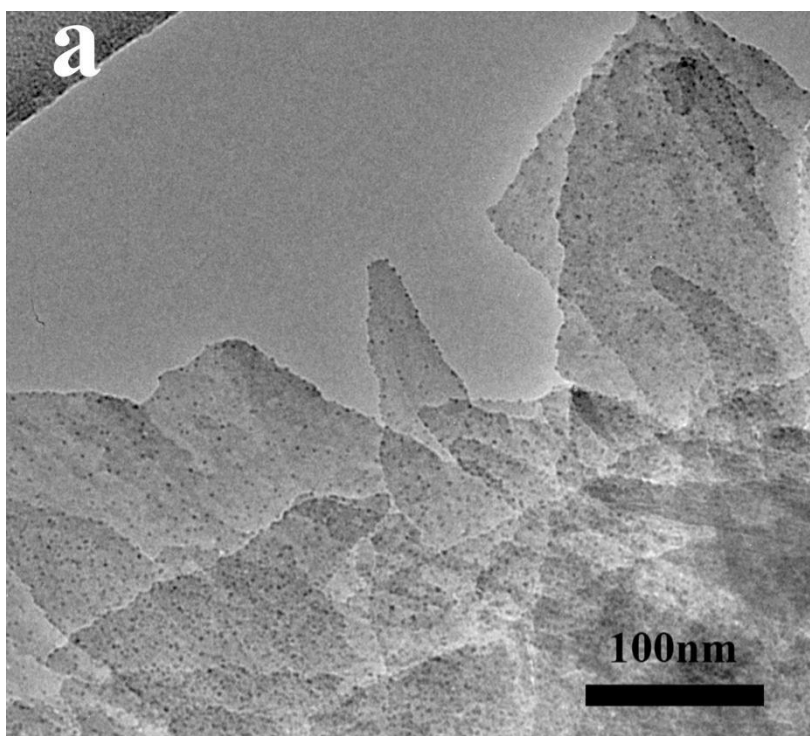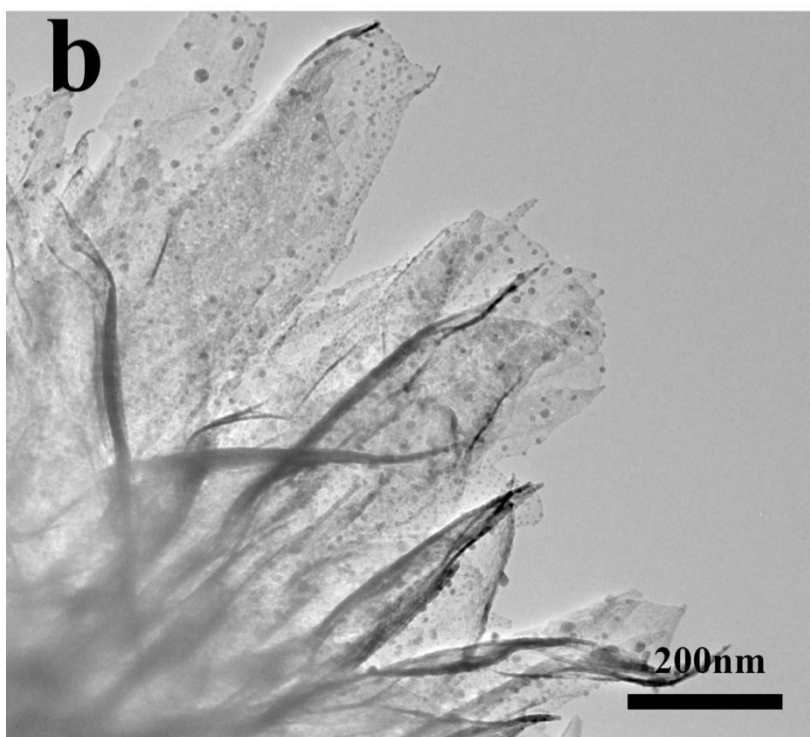

**Fig. S2** TEM image of CZA-2.

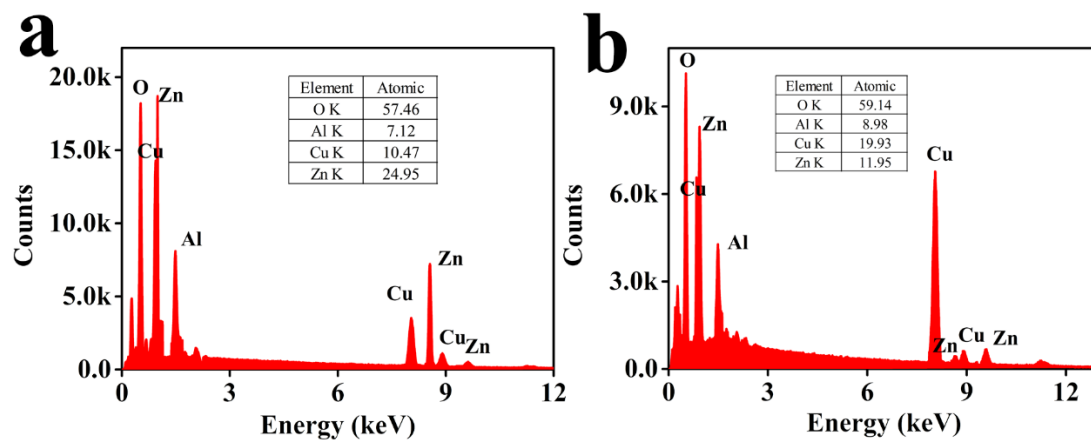

Fig. S3 EDS spectra of (a) CZA-1 and (b) CZA-3.

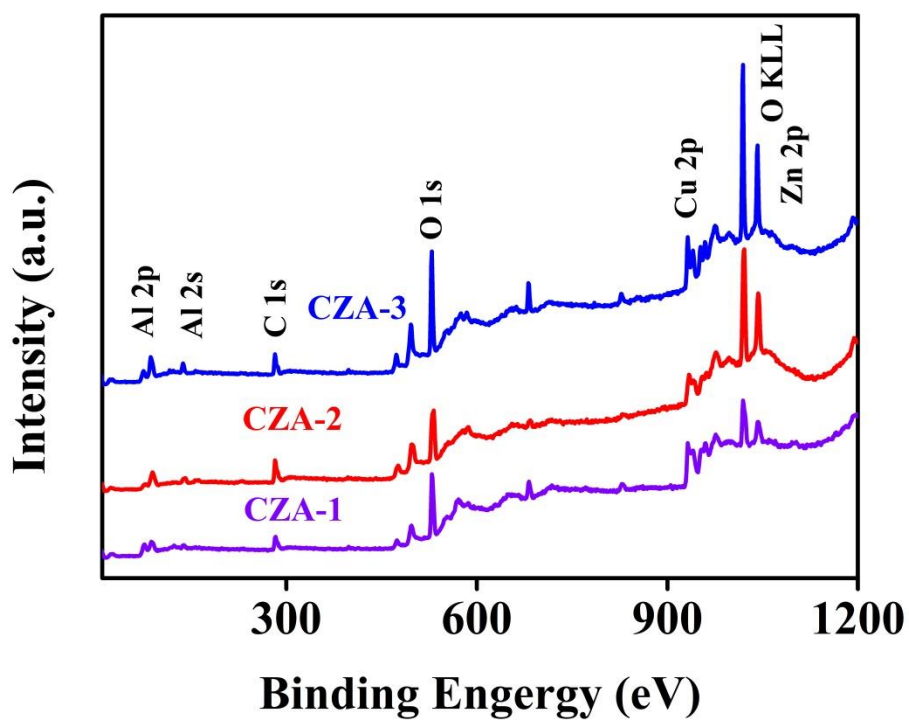

Fig. S4 XPS spectra of CZA-LDHs

**Table S2** XPS peaks fitting results of O 1s of CZA-1, CZA-2 and CZA-3

| Samples        | CZA-1          |                |                | CZA-2                |                      |                      | CZA-3          |                |                |
|----------------|----------------|----------------|----------------|----------------------|----------------------|----------------------|----------------|----------------|----------------|
| Peaks          | O <sub>1</sub> | O <sub>a</sub> | O <sub>2</sub> | <b>O<sub>1</sub></b> | <b>O<sub>a</sub></b> | <b>O<sub>2</sub></b> | O <sub>1</sub> | O <sub>a</sub> | O <sub>2</sub> |
| Position (eV)  | 528.60         | 529.28         | 530.03         | <b>528.39</b>        | <b>529.05</b>        | <b>529.78</b>        | 528.48         | 529.16         | 529.94         |
| Area ratio (%) | 34.29          | 36.05          | 29.66          | <b>28.63</b>         | <b>41.02</b>         | <b>30.35</b>         | 34.89          | 36.25          | 28.86          |

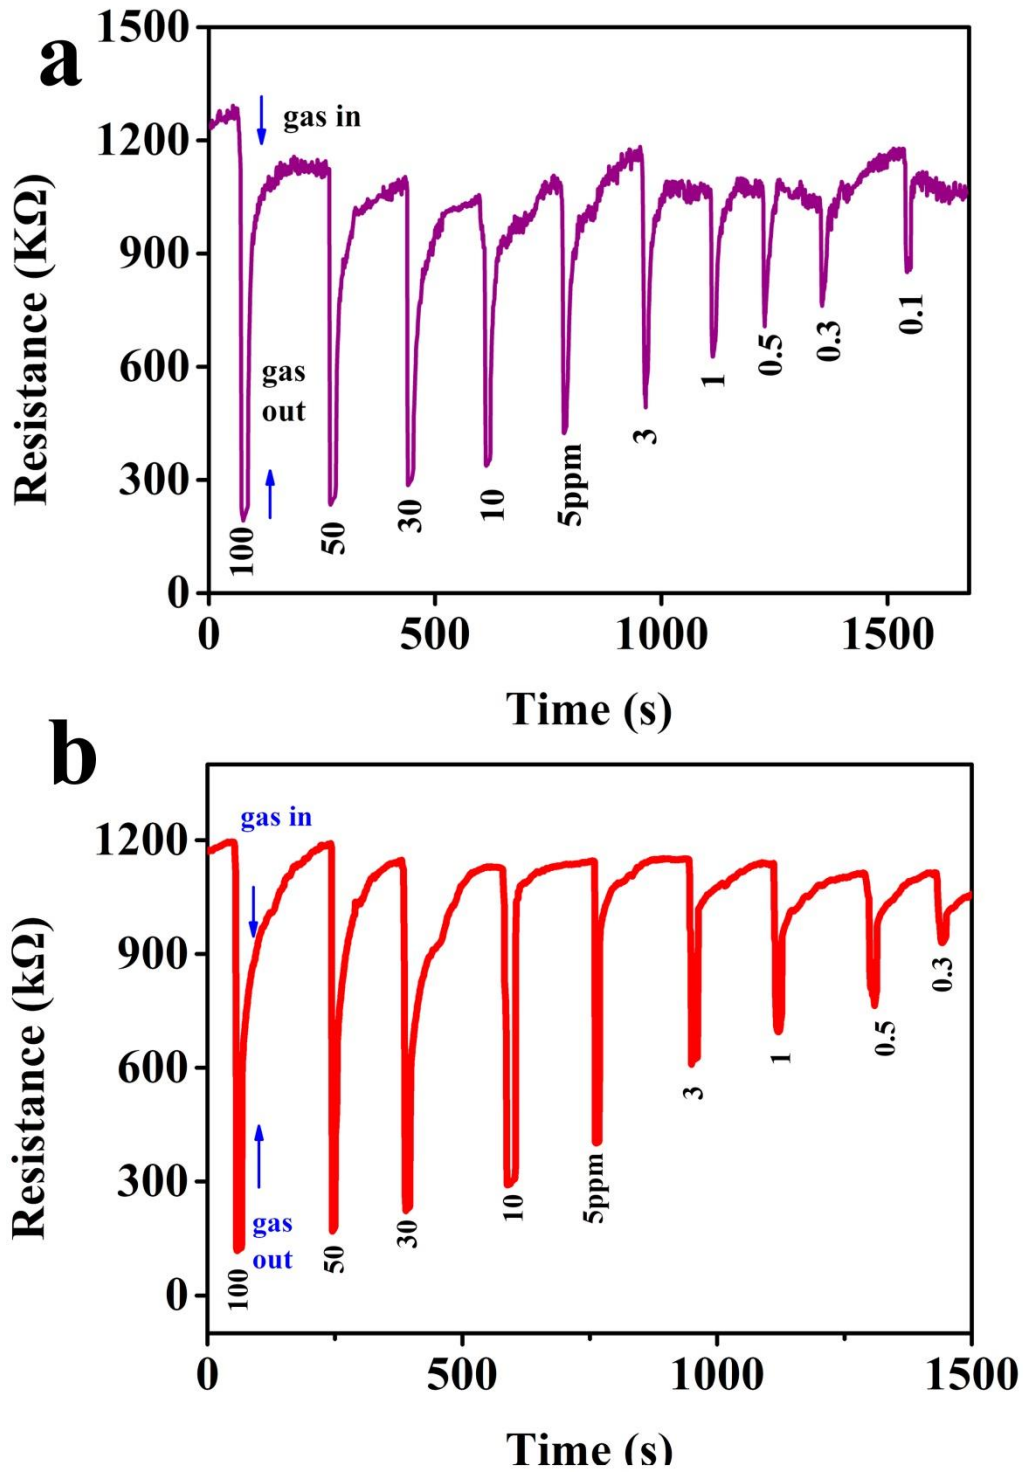

**Fig.S5** Dynamic response and recovery curve of the (a) CZA-1 and (b) CZA-3 gas sensor to  $NO_2$  at RT (RH 26%)



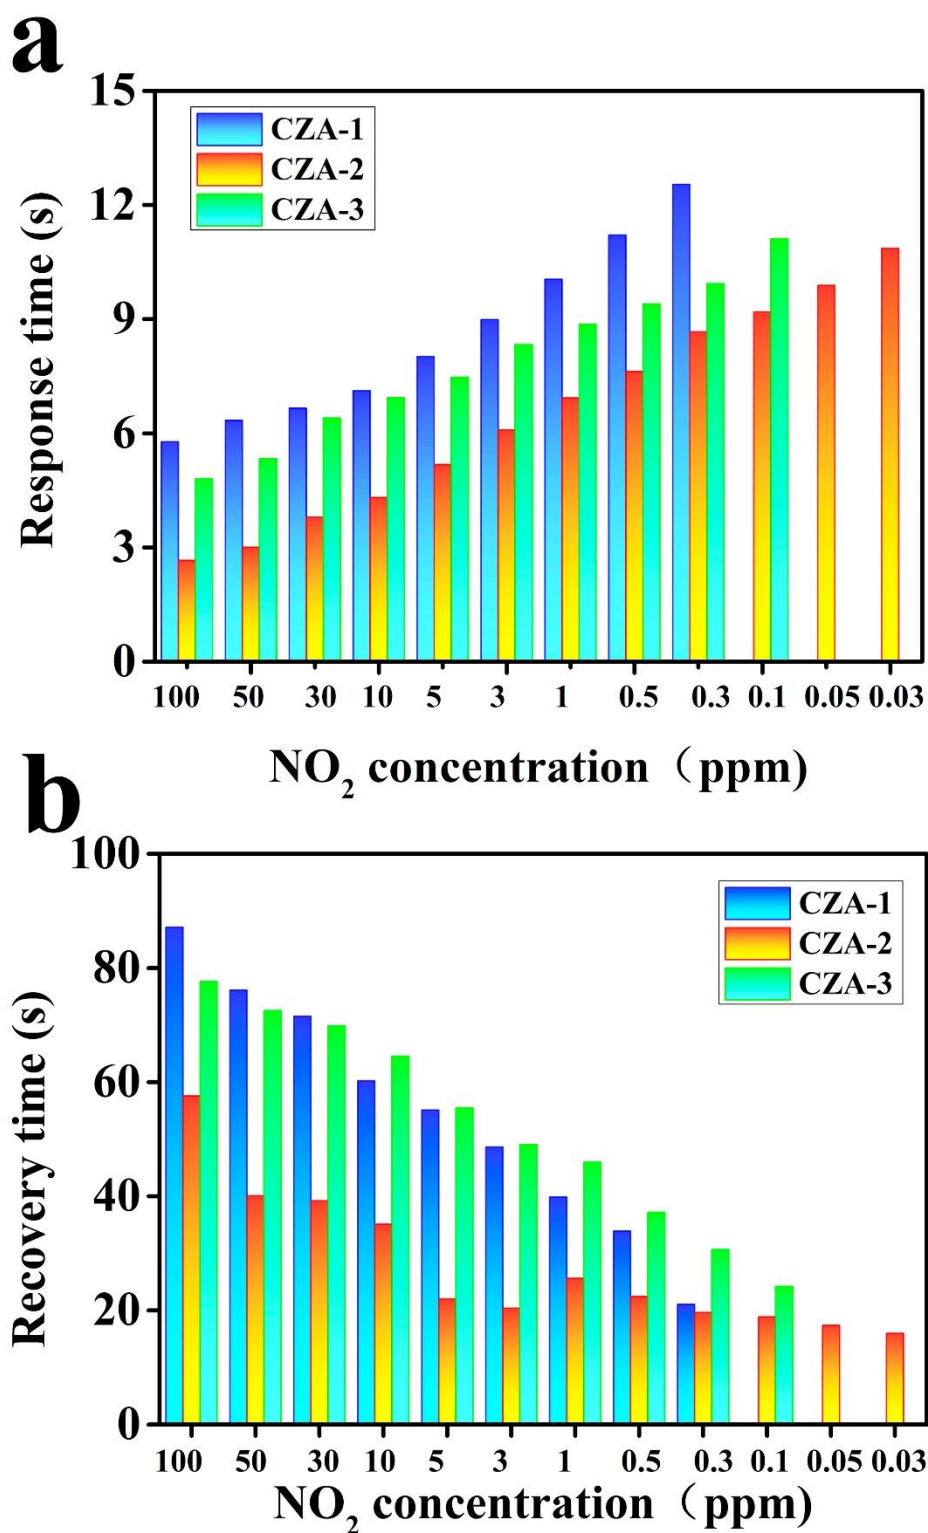

**Fig.S6** The response time (a) and recovery time (b) of CZA-1, CZA-2 and CZA-3.

**Table S3.** The response, response time and recovery time of three samples at room temperature for different amounts of NO<sub>2</sub>

| Samples     | CZA-1                 |       |                    | CZA-2              |              |                    | CZA-3              |       |                    |                    |
|-------------|-----------------------|-------|--------------------|--------------------|--------------|--------------------|--------------------|-------|--------------------|--------------------|
|             | NO <sub>2</sub> (ppm) | R     | Tr <sub>1</sub> /s | Tr <sub>2</sub> /s | R            | Tr <sub>1</sub> /s | Tr <sub>2</sub> /s | R     | Tr <sub>1</sub> /s | Tr <sub>2</sub> /s |
| <b>100</b>  | 6.56                  | 5.78  | 87.15              | <b>22.30</b>       | <b>2.66</b>  | <b>57.60</b>       | 10.23              | 4.80  | 77.60              |                    |
| <b>50</b>   | 5.15                  | 6.34  | 76.11              | <b>13.95</b>       | <b>3.01</b>  | <b>40.12</b>       | 8.54               | 5.33  | 72.53              |                    |
| <b>30</b>   | 4.11                  | 6.66  | 71.53              | <b>10.50</b>       | <b>3.80</b>  | <b>39.21</b>       | 6.81               | 6.40  | 69.87              |                    |
| <b>10</b>   | 3.65                  | 7.12  | 60.23              | <b>7.26</b>        | <b>4.31</b>  | <b>35.11</b>       | 5.15               | 6.93  | 64.53              |                    |
| <b>5</b>    | 3.07                  | 8.02  | 55.10              | <b>4.36</b>        | <b>5.18</b>  | <b>22.04</b>       | 3.88               | 7.47  | 55.47              |                    |
| <b>3</b>    | 2.56                  | 8.99  | 48.65              | <b>3.06</b>        | <b>6.09</b>  | <b>20.40</b>       | 2.85               | 8.33  | 49.07              |                    |
| <b>1</b>    | 1.88                  | 10.05 | 39.89              | <b>2.11</b>        | <b>6.93</b>  | <b>25.63</b>       | 1.90               | 8.87  | 45.94              |                    |
| <b>0.5</b>  | 1.45                  | 11.21 | 33.89              | <b>1.72</b>        | <b>7.63</b>  | <b>22.45</b>       | 1.64               | 9.40  | 37.20              |                    |
| <b>0.3</b>  | 1.18                  | 12.54 | 21.09              | <b>1.39</b>        | <b>8.67</b>  | <b>19.66</b>       | 1.43               | 9.93  | 30.64              |                    |
| <b>0.1</b>  |                       |       |                    | <b>1.31</b>        | <b>9.19</b>  | <b>18.89</b>       | 1.16               | 11.11 | 24.21              |                    |
| <b>0.05</b> |                       |       | 1                  | <b>1.23</b>        | <b>9.89</b>  | <b>17.41</b>       |                    |       |                    |                    |
| <b>0.03</b> |                       |       |                    | <b>1.17</b>        | <b>10.86</b> | <b>16.00</b>       |                    |       |                    |                    |

\*R: Response    Tr<sub>1</sub>: Response time    Tr<sub>2</sub>: Recovery time

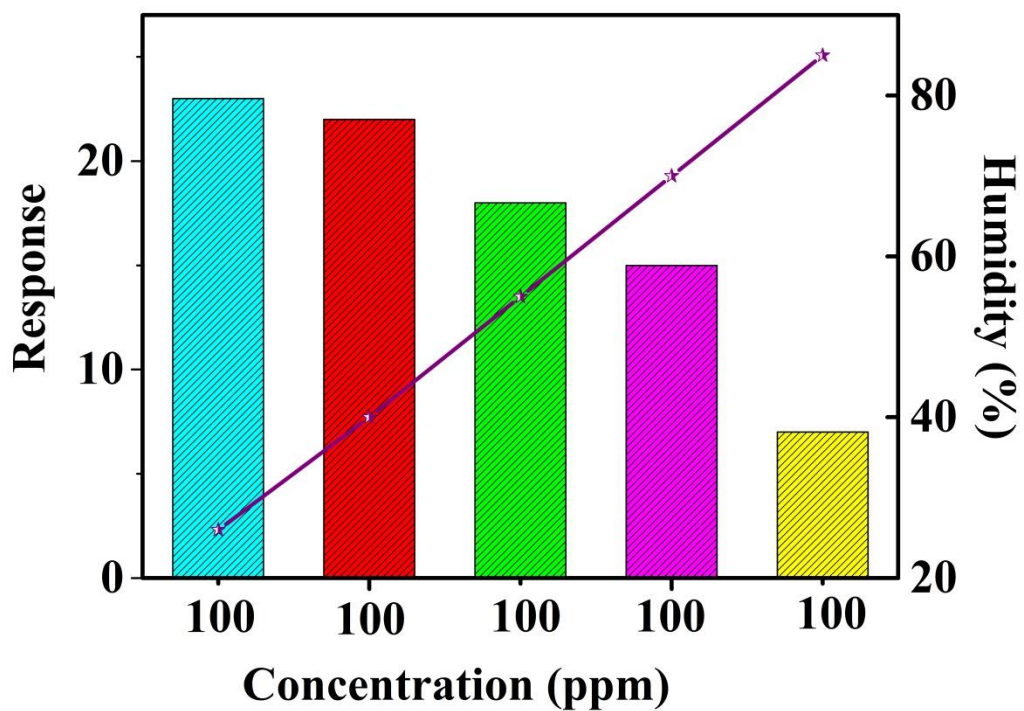

**Fig. S7** The response value of CZA-2 sensor to 100 ppm NO<sub>2</sub> under different humidity (26%, 40%, 55%, 70%, 85%) at room temperature.

**Table S4** XPS peaks fitting results of O 1s of CZA-2 and CZA-2 of absorption NO<sub>2</sub>

| Samples           | CZA-2  |        |        | CZA-2 (after NO <sub>2</sub> absorption) |              |              |
|-------------------|--------|--------|--------|------------------------------------------|--------------|--------------|
|                   | O1     | Oa     | O2     | <b>O1</b>                                | <b>Oa</b>    | <b>O2</b>    |
| Peaks             | O1     | Oa     | O2     | <b>O1</b>                                | <b>Oa</b>    | <b>O2</b>    |
| Position<br>(eV)  | 528.39 | 529.05 | 529.78 | 528.40                                   | 529.20       | 530.15       |
| Area ratio<br>(%) | 28.63  | 41.02  | 30.35  | 27.45                                    | <b>50.62</b> | <b>21.93</b> |

**References:**

- 1 Y. Qin, H. Gui, Y. Bai and S. Liu, *Sens. Actuator B-Chem.*, 2022, **352**.
- 2 X. Zhang, M. Ikram, Z. Liu, L. Teng, J. Xue, D. Wang, L. Li and K. Shi, *RSC Adv.*, 2019, **9**, 8768-8777.
- 3 Y. Qin, L. Wang and X. Wang, *Organic Electronics*, 2019, **66**, 102-109.
- 4 Y. Li, F. Zhou, L. Gao and G. Duan, *Sens. Actuator B-Chem.*, 2018, **261**, 537-549.
- 5 D. Hong, J. Zhang, A. U. Rehman, L. Gong, J. Zhou, K. Kan, L. Li and K. Shi, *RSC Adv.*, 2016, **6**, 103192-103198.
